# Supplementary material for: A high-throughput drug combination screen identifies an anti-glioma synergism between TH588 and PI3K inhibitors
Source: PubMed Central journal article supplement (PMC7376673; doi:10.1186/s12935-020-01427-0), 2020-07-23
Supplement: 12935_2020_1427_MOESM1_ESM.pdf [file 12935_2020_1427_MOESM1_ESM.pdf]

**Figure S1**

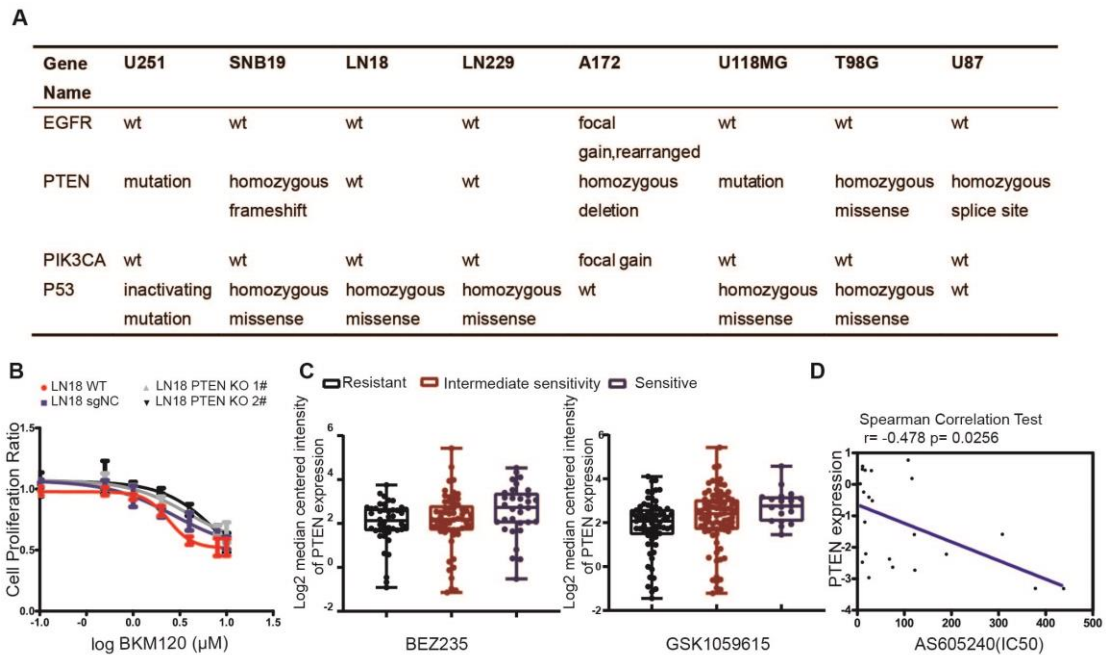

**Figure S1. PTEN gene mutations in GBM cells and its impact on drug sensitivities of PI3K inhibitors.** (A) Mutations of four essential GBM oncogenes or tumor suppressor genes in eight GBM cell lines. (B) Antiproliferation rate of LN18, LN18 sgRNA negative control, LN18 PTEN knockout #1 and 2 cell lines upon treatment of BKM120. (C) PTEN expression in PI3K inhibitor sensitive, intermediate sensitive or resistant cell lines collection. GSK1059615 is a dual inhibitor of pan-class I PI3K and mTOR kinase. (D) Linear regression of PTEN protein levels and BKM120 sensitivity demonstrated a strong correlative trend in terms of R and p values by Spearman's rank correlation test ( $p=0.0256$ ). Data of C and D were obtained from public database (Wooster dataset and Oncomine database).
