# Supplementary material for: A high-throughput drug combination screen identifies an anti-glioma synergism between TH588 and PI3K inhibitors
Source: PubMed Central journal article supplement (PMC7376673; doi:10.1186/s12935-020-01427-0), 2020-07-23
Supplement: 12935_2020_1427_MOESM3_ESM.pdf [file 12935_2020_1427_MOESM3_ESM.pdf]

**Figure S3**

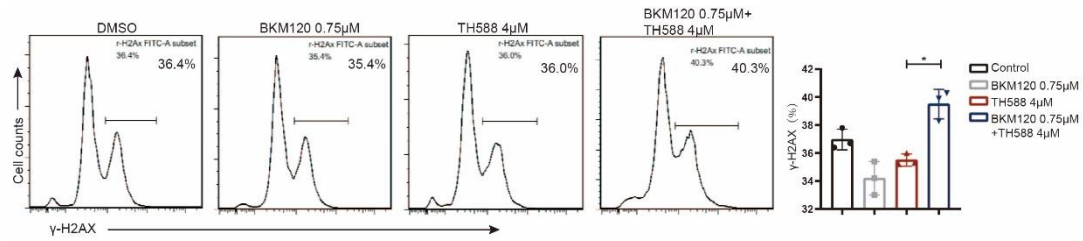

**Figure S3. Treatment of BKM120 and TH588 caused elevation of  $\gamma$ -H2AX-positive cells.**

Left: Flow cytometry analysis of  $\gamma$ -H2AX stained LN229 GBM cells following treatment of vehicle (DMSO), BKM120, TH588 and combination of both for 24 h. Right: Quantification of  $\gamma$ -H2AX-positive LN229 cells of each type of treatment in triplicates.
