# Supplementary material for: A high-throughput drug combination screen identifies an anti-glioma synergism between TH588 and PI3K inhibitors
Source: PubMed Central journal article supplement (PMC7376673; doi:10.1186/s12935-020-01427-0), 2020-07-23
Supplement: 12935_2020_1427_MOESM4_ESM.pdf [file 12935_2020_1427_MOESM4_ESM.pdf]

**Figure S4**

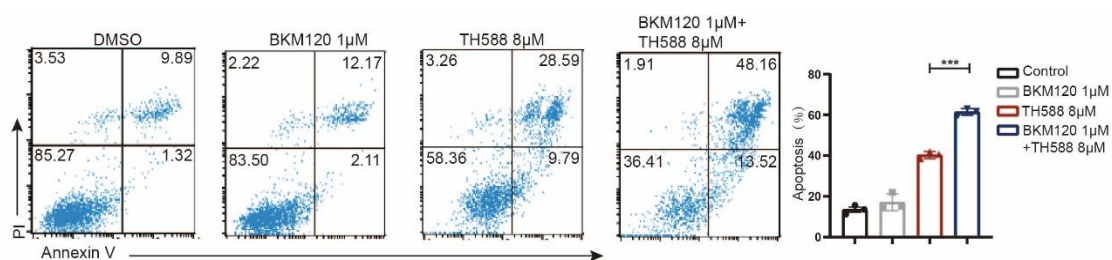

**Figure S4. Flow cytometric analysis of apoptotic cells upon treatment of TH588 and/or BKM120.** Left: H460 cells were treated with vehicle (DMSO), BKM120, TH588 or combination of both for 24 h and analyzed by flow cytometry for quantification of the fraction of apoptotic cells (pre-stained with annexin V/PI). Right: Quantification of apoptotic fraction of H460 cells received each type of treatment in triplicates.
