# Supplementary material for: A high-throughput drug combination screen identifies an anti-glioma synergism between TH588 and PI3K inhibitors
Source: PubMed Central journal article supplement (PMC7376673; doi:10.1186/s12935-020-01427-0), 2020-07-23
Supplement: 12935_2020_1427_MOESM5_ESM.pdf [file 12935_2020_1427_MOESM5_ESM.pdf]

**Figure S5**

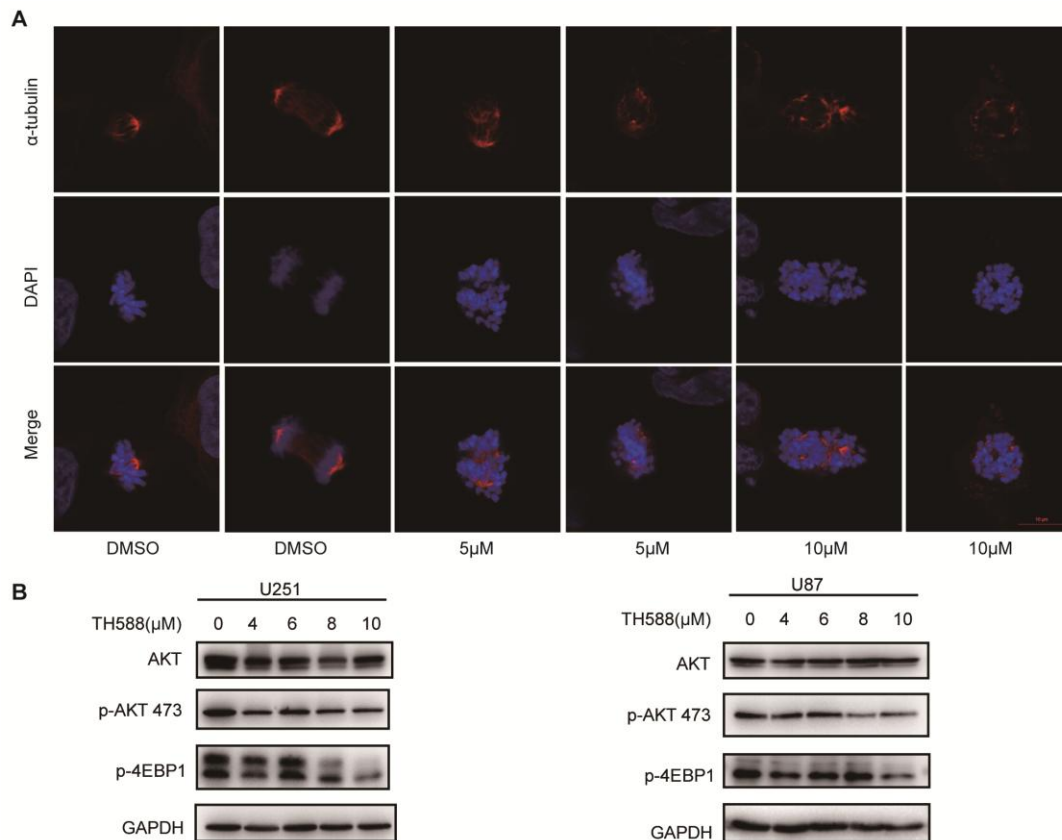

**Figure S5. TH588 disrupts mitotic spindles and causes AKT pathway downregulation.**

(A) Photomicrographs of mitotic cells treated with DMSO or TH588 for 48 hours showing  $\alpha$ -tubulin (red), and chromatin (blue, DAPI). Scale bar = 10  $\mu$ m. (B) Western blot analysis of components from the AKT pathway were analyzed after 48 hours treatment of TH588.
